# Supplementary material for: MS4A6A genotypes are associated with the atrophy rates of Alzheimer's disease related brain structures
Source: PubMed Central journal article supplement (PMC5312275; doi:10.18632/oncotarget.9563), 2016-05-23
Supplement: oncotarget-07-58779-s001.pdf [file oncotarget-07-58779-s001.pdf]

## MS4A6A genotypes are associated with the atrophy rates of Alzheimer's disease related brain structures

### Supplementary Materials

Supplementary table 1- Information of SNP in the process of SNP selection

| SNP      | Chr | Position     | P Value               | Population type                                                                                                                        | SNP source    | Inclusion | Ref.       |
|----------|-----|--------------|-----------------------|----------------------------------------------------------------------------------------------------------------------------------------|---------------|-----------|------------|
| rs610932 | 11  | 3'UTR        | $1.4 \times 10^{-6}$  | Europe and the USA                                                                                                                     | GWAS          | yes       | [19734902] |
| rs610932 | 11  | 3'UTR        | $1.2 \times 10^{-16}$ | GERAD1&2, EADI1&2, ADNI, TGEN1, Decode, AD-IG, CHARGE, Mayo2 and ADGC                                                                  | Meta-analysis | yes       | [21460840] |
| rs610932 | 11  | 3'UTR        | <0.001                | Chinese Han population                                                                                                                 | Replication   | yes       | [22382309] |
| rs610932 | 11  | 3'UTR        | 0.019                 | Northern Han Chinese population                                                                                                        | Replication   | yes       | [23232270] |
| rs610932 | 11  | 3'UTR        | 0.043                 | the cross-European AddNeuroMed or the King's Health Partners/Maudsley BRC and Dementia Case Registry at King's Health Partners studies | Replication   | yes       | [24064185] |
| rs7232   | 11  | Coding, non- | 0.045                 | the cross-European AddNeuroMed or the King's                                                                                           | Replication   | yes       | [24064185] |

|            |    | synonymous             |                        | Health Partners/Maudsley BRC and Dementia Case<br>Registry at King's Health Partners studies                                                 |               |     |            |
|------------|----|------------------------|------------------------|----------------------------------------------------------------------------------------------------------------------------------------------|---------------|-----|------------|
| rs7232     | 11 | Nonsynonymous          | 0.1130                 | Korean Population                                                                                                                            | Replication   | yes | [22975751] |
| rs12453    | 11 | Synonymous             | 0.0831                 | Korean Population                                                                                                                            | Replication   | yes | [22975751] |
| rs662196   | 11 | Intronic               | $5.2 \times 10^{-6}$   | Europe and the USA                                                                                                                           | GWAS          | no  | [19734902] |
| rs583791   | 11 | Intronic               | $5.3 \times 10^{-6}$   | Europe and the USA                                                                                                                           | GWAS          | no  | [19734902] |
| rs583791   | 11 | Intronic               | $1.868 \times 10^{-9}$ | Spanish population and four other public GWASs<br>(ADNI, GenADA, NIA and TGEN)                                                               | Meta-analysis | no  | [21627779] |
| rs583791   | 11 | Coding, non-synonymous | 0.033                  | the cross-European AddNeuroMed or the King's<br>Health Partners/Maudsley BRC and Dementia Case<br>Registry at King's Health Partners studies | Replication   | no  | [24064185] |
| rs17602572 | 11 | NA                     | $1.151 \times 10^{-5}$ | Spanish population and four other public GWASs<br>(ADNI, GenADA, NIA and TGEN)                                                               | Meta-analysis | no  | [21627779] |
| rs2278867  | 11 | NA                     | $9.928 \times 10^{-6}$ | Spanish population and four other public GWASs<br>(ADNI, GenADA, NIA and TGEN)                                                               | Meta-analysis | no  | [21627779] |
| rs646924   | 11 | Intron                 | 0.4876                 | Korean Population                                                                                                                            | Replication   | no  | [22975751] |
| rs632185   | 11 | Upstream               | 0.5101                 | Korean Population                                                                                                                            | Replication   | no  | [22975751] |

|             |    |                 |                       |                                                                                                                               |               |    |            |
|-------------|----|-----------------|-----------------------|-------------------------------------------------------------------------------------------------------------------------------|---------------|----|------------|
| rs983392    | 11 | NA              | $6.1 \times 10^{-16}$ | ADGC, CHARGE, EADI, GERAD and Austria, Belgium, Finland, Germany, Greece, Hungary, Italy, Spain, Sweden, UK and United States | Meta-analysis | no | [24162737] |
| rs138650483 | 11 | exonic/splicing | NA                    | Caribbean Hispanics families, NIA-LOAD Family Study and Canadian individuals of European ancestry                             | GWAS          | no | [26101835] |

**Abbreviation:** 3'UTR =3'-untranslated region, ADGC=Alzheimer's Disease Genetics Consortium, AD-IG=German Alzheimer's Disease Integrated Genome Research Network, ADNI= Alzheimer's Disease Neuroimaging Initiative cohort, CHARGE =Cohorts for Heart and Aging Research in Genomic Epidemiology, EADI=European AD Initiative Consortium, GenADA=Genotype-Phenotype Associations in Alzheimer's Disease Study, GERAD=Genetic and Environmental Risk in Alzheimer's Disease Consortium, GWAS=genome-wide association study, NIA-LOAD=National Institute on Aging Late-Onset Alzheimer's Disease cohort, SNP=single nucleotide polymorphism, TGEN=Translational Genomics Research Institute cohort.

Supplementary table 2- Detailed results of the associations of *MS4A6A* loci with brain regions on MRI in all group

| ROI                         | SNP      | Follow-up (1 year) |                         |                        | Follow-up (2 year) |                        |                |
|-----------------------------|----------|--------------------|-------------------------|------------------------|--------------------|------------------------|----------------|
|                             |          | Sample (L/R)       | P-value (L/R)           | P-FDR (L/R)            | Sample (L/R)       | P-value (L/R)          | P-FDR (L/R)    |
| Middle Temporal<br>(volume) | rs610932 | 442/442            | <b>0.005532</b> /0.6863 | <b>0.0166</b> /0.84    | 233/233            | 0.4559/0.2453          | 0.6128/0.3679  |
|                             | rs7232   | 442/442            | <b>0.01443</b> /0.6805  | <b>0.02165</b> /0.84   | 233/233            | 0.1734/0.1203          | 0.5201/0.3609  |
|                             | rs12453  | 442/442            | 0.06276/0.84            | 0.06276/0.84           | 233/233            | 0.6128/0.4107          | 0.6128/0.4107  |
| Entorhinal (volume)         | rs610932 | 442/442            | <b>0.007245</b> /0.9723 | <b>0.02174</b> /0.9723 | 233/233            | 0.104/0.3374           | 0.104/0.6116   |
|                             | rs7232   | 442/442            | 0.05276/0.7817          | 0.5276/0.9723          | 233/233            | <b>0.03268</b> /0.4773 | 0.0757/0.6116  |
|                             | rs12453  | 442/442            | 0.05114/0.8898          | 0.05276/0.9723         | 233/233            | 0.05046/0.6116         | 0.0757/0.6116  |
| Parahippocampal<br>(volume) | rs610932 | 442/442            | 0.3798/0.2431           | 0.09627/0.5848         | 232/233            | 0.1446/0.2052          | 0.1446/0.4078  |
|                             | rs7232   | 442/442            | 0.9627/0.5848           | 0.09627/0.5848         | 232/233            | <b>0.02415</b> /0.3147 | 0.07244/0.4078 |
|                             | rs12453  | 442/442            | 0.959/0.3933            | 0.09627/0.5848         | 232/233            | 0.09594/0.4078         | 0.1439/0.4078  |
| Posterior Cingulate         | rs610932 | 442/442            | 0.4828/0.1853           | 0.9221/0.556           | 233/233            | <b>0.02287</b> /0.0858 | 0.06862/0.2142 |

|                            |          |         |                        |                       |         |                      |               |
|----------------------------|----------|---------|------------------------|-----------------------|---------|----------------------|---------------|
| (volume)                   | rs7232   | 442/442 | 0.9221/0.7442          | 0.9221/0.7442         | 233/233 | 0.422/0.2321         | 0.422/0.2321  |
|                            | rs12453  | 442/442 | 0.7418/0.3937          | 0.9221/0.5906         | 233/233 | 0.2189/0.1428        | 0.3284/0.2142 |
| <b>Precuneus (volume)</b>  | rs610932 | 442/442 | <b>0.004913/0.1585</b> | <b>0.01474/0.4693</b> | 233/233 | <b>0.0265/0.8309</b> | 0.7949/0.89   |
|                            | rs7232   | 442/442 | 0.06572/0.4095         | 0.06572/0.4693        | 233/233 | 0.1248/0.89          | 0.1248/0.89   |
|                            | rs12453  | 442/442 | 0.5204/0.4693          | 0.06572/0.4693        | 233/233 | 0.08419/0.7877       | 0.1248/0.89   |
| <b>Hippocampus</b>         | rs610932 | 442/442 | 0.1491/0.8136          | 0.3366/0.8136         | 233/233 | 0.2056/0.6141        | 0.3304/0.9842 |
| (volume)                   | rs7232   | 442/442 | 0.3771/0.5116          | 0.3771/0.7675         | 233/233 | 0.3304/0.8039        | 0.3304/0.9842 |
|                            | rs12453  | 442/442 | 0.2244/0.3082          | 0.3366/0.7675         | 233/233 | 0.2272/0.9842        | 0.3304/0.9842 |
| <b>CA1 region (volume)</b> | rs610932 | 442/442 | 0.7154/0.3326          | 0.8769/0.3871         | 232/232 | 0.7999/0.9491        | 0.8342/0.9491 |
|                            | rs7232   | 442/442 | 0.2333/0.1464          | 0.6998/0.3871         | 232/232 | 0.4937/0.1418        | 0.8342/0.3288 |
|                            | rs12453  | 442/442 | 0.8769/0.3871          | 0.8769/0.3871         | 232/232 | 0.8342/0.2192        | 0.8342/0.3288 |
| <b>Entorhinal</b>          | rs610932 | 442/442 | 0.9107/0.3884          | 0.9107/0.4859         | 233/233 | 0.8667/0.5608        | 0.8667/0.9687 |
| (thickness)                | rs7232   | 442/442 | 0.8557/0.4859          | 0.9107/0.4859         | 233/233 | 0.2491/0.8301        | 0.7473/0.9687 |
|                            | rs12453  | 442/442 | 0.6601/0.4552          | 0.9107/0.4859         | 233/233 | 0.5125/0.9687        | 0.7688/0.9687 |

**Abbreviation:** ROI=regions of interest; SNP=single nucleotide polymorphism; L=Left; R=Right.

**Supplementary table 3- Detailed results of the associations of *MS4A6A* loci with Glucose metabolism or A $\beta$  deposition on imaging in all group**

| ROI                         | SNP      | Follow-up (2 year) |               |               |
|-----------------------------|----------|--------------------|---------------|---------------|
|                             |          | Sample (L/R)       | P-value (L/R) | P-FDR (L/R)   |
| Angular (CMRg)              | rs610932 | 299/299            | 0.6556/0.6735 | 0.6556/0.6735 |
|                             | rs7232   | 299/299            | 0.3834/0.2897 | 0.64/0.4605   |
|                             | rs12453  | 299/299            | 0.4266/0.307  | 0.64/0.4605   |
| Post Cingulum (B)<br>(CMRg) | rs610932 | 299                | 0.7415        | 0.7415        |
|                             | rs7232   | 299                | 0.1015        | 0.4054        |
|                             | rs12453  | 299                | 0.2703        | 0.4054        |
| Temporal (CMRg)             | rs610932 | 299/299            | 0.4318/0.9304 | 0.4318/0.9304 |
|                             | rs7232   | 299/299            | 0.1015/0.4946 | 0.2707/0.7419 |
|                             | rs12453  | 299/299            | 0.1804/0.4076 | 0.2707/0.7419 |

|                         |                 |            |               |               |
|-------------------------|-----------------|------------|---------------|---------------|
| <b>Cingulate (AV45)</b> | <b>rs610932</b> | <b>381</b> | <b>0.8351</b> | <b>0.866</b>  |
|                         | <b>rs7232</b>   | <b>381</b> | <b>0.9728</b> | <b>0.866</b>  |
|                         | <b>rs12453</b>  | <b>381</b> | <b>0.7047</b> | <b>0.866</b>  |
| <b>Frontal (AV45)</b>   | <b>rs610932</b> | <b>381</b> | <b>0.7338</b> | <b>0.9431</b> |
|                         | <b>rs7232</b>   | <b>381</b> | <b>0.9413</b> | <b>0.866</b>  |
|                         | <b>rs12453</b>  | <b>381</b> | <b>0.581</b>  | <b>0.866</b>  |
| <b>Parietal (AV45)</b>  | <b>rs610932</b> | <b>381</b> | <b>0.6038</b> | <b>0.6322</b> |
|                         | <b>rs7232</b>   | <b>381</b> | <b>0.8355</b> | <b>0.3966</b> |
|                         | <b>rs12453</b>  | <b>381</b> | <b>0.4472</b> | <b>0.3966</b> |
| <b>Temporal (AV45)</b>  | <b>rs610932</b> | <b>381</b> | <b>0.4286</b> | <b>0.6505</b> |
|                         | <b>rs7232</b>   | <b>381</b> | <b>0.588</b>  | <b>0.5382</b> |
|                         | <b>rs12453</b>  | <b>381</b> | <b>0.3207</b> | <b>0.5382</b> |
